# Supplementary material
Source: publisher site journal article supplement (https://vertebrate-zoology.arphahub.com/article/65952/download/suppl/32/)
Supplement: Supplementary file 1

Table S2: Gazetteer for collection sites with information on localities and/or coordinates.

| **country** | **Province/State** | **Region/Locality** | **latitude** | **longitude** |
| --- | --- | --- | --- | --- |
| Austria | Salzburg | Arthurhaus near Mühlberg at Hochkönig | 47.4097°N | 13.1283°E |
| Cape Verde | Sal | Buracona | 16.8061°N | 22.9923°W |
| China | Qinghai | Huashixia | 35.1125°N | 98.8638°E |
| China | Qinghai | Nanshan | 36.5800°N | 100.0000°E |
| China | Qinghai | steppe highlands near Maduo | 35.0333°N | 96.3833°E |
| China | Qinghai | Maduo | 34.8985°N | 98.1846°E |
| China | Qinghai | Heimahe | 36.7278°N | 99.7751°E |
| China | Qinghai | near Heimahe, "Meisental" | 36.7167°N | 99.7667°E |
| China | Sichuan | Mamize Nature Reserve | 28.4000°N | 103.3167°E |
| China | Qinghai | NE shore of Tsaring Nor (Gyaring Lake) | 34.8982°N | 97.4870°E |
| China | Tibet | Tanggula Mountains | 33.2300°N | 91.1100°E |
| China | Qinghai | Tianjun | 38.0000°N | 98.5000°E |
| Egypt | Al-Bawiti | Lake Marun, Bahariya Oasis | 28.4197°N | 28.8782°E |
| Germany | Saxony | Dresden | 51.0554°N | 13.7257°E |
| Ghana | Upper West Region | Gbele Resource Reserve | 10.5000°N | 2.1167°W |
| Italy |  | Dolomites | 46.4000°N | 11.8500°E |
| Italy | Pantelleria |  | 36.8207°N | 11.9674°E |
| Mongolia | Mongolian Altai | Bondoch Gol | 47.5150°N | 92.3050°E |
| Mongolia | Gobi Altai | Echin-Gol Oasis | 43.1000°N | 97.0000°E |
| Mongolia | Töv Aymag | dry waterway with Spirea bushes | 47.3167°N | 105.4000°E |
| Namibia |  | Sossusvlei-Namtip | 24.7254°S | 15.4711°E |
| Philippines | Mindanao | Katanglad Volcano | 8.1178°N | 124.9238°E |
| Russia | Dagestan | Kurush | 41.2833°N | 47.8333°E |
| Russia | Respublika Tyva | Mongun-Taiginskiy Kozhuun | 50.3500°N | 90.4900°E |
| Singapore |  | Pasir Ris, 1 km NW | 1.3874°N | 103.9230°E |
| South Africa | Northwest Province | Molopo Reserve, Vorstershoop, 10 km W | 25.8490°S | 22.9288°E |
| Spain | Cazeres | Extremadura, Torrejon el Rubio | 39.7729°N | 6.0123°W |
| Spain | Canary Islands | Tenerife | 28.3000°N | 16.6000°W |
| Spain | Madrid | Madrid | 40.4200°N | 3.7000°W |
| Spain | Eastern Pyrenees |  | 42.8190°N | 2.8010°W |
| Switzerland | southern Swiss Alps |  | 46.8090°N | 7.8280°W |
| Switzerland | southern Swiss Alps |  | 46.8400°N | 9.8190°W |

**Additional references**

Ericson PGP, Johanson US (2003) Phylogeny of Passerida (Aves: Passeriformes) based on nuclear and mitochondrial sequence data. Molecular Phylogenetics and Evolution 29: 126-138.

Fregin S, Haase M, Olsson U, Alström P (2012) New insights into family relationships within the avian superfamily Sylvioidea (Passeriformes) based on seven molecular markers. BMC Evolutionary Biology 12, Article number 157.

Klicka J, Burns K, Spellman G (2007) Defining a monophyletic Cardinalini: A molecular perspective. Molecular Phylogenetics and Evolution 45: 1014-1032.

Qu Y, Lei F, Zhang R, Lu X (2010) Comparative phylogeography of five avian species: implications for Pleistocene evolutionary history in the Qinghai–Tibetan plateau. Molecular Ecology 19: 338–351.

Valente L, Illera JC, Havenstein K, Pallien T, Etienne RS, Tiedemann R (2017) Equilibrium Bird Species Diversity in Atlantic Islands. Current Biology 27, 1660–1666.
